# Supplementary material for: Usability Study of Mainstream Wearable Fitness Devices: Feature Analysis and System Usability Scale Evaluation
Source: PubMed Central journal article supplement (PMC6250954; doi:10.2196/11066), 2018-11-08
Supplement: mhealth_v6i11e11066_app2.pdf [file mhealth_v6i11e11066_app2.pdf]

## Appendix A

### A-2 SUS score of each question for each device

Table 5. SUS mean score of each question for each device.

| Device                 |               | SUS  | SUS  | SUS  | SUS  | SUS  | SUS  | SUS  | SUS  | SUS  | SUS  |
|------------------------|---------------|------|------|------|------|------|------|------|------|------|------|
|                        |               | _1   | _2   | _3   | _4   | _5   | _6   | _7   | _8   | _9   | _10  |
| AW<br>(N=8<br>3)       | Mean          | 2.86 | 1.71 | 2.90 | 2.30 | 2.60 | 2.11 | 2.84 | 2.20 | 2.78 | 2.23 |
|                        | Std.          | 1.00 | 1.16 | 0.89 | 1.26 | 0.95 | 1.14 | 0.89 | 1.23 | 0.96 | 1.26 |
|                        | Devia<br>tion |      |      |      |      |      |      |      |      |      |      |
| SGS<br>(N=3<br>6)      | Mean          | 2.72 | 1.61 | 3.08 | 2.31 | 2.78 | 1.92 | 2.86 | 2.14 | 3.06 | 2.36 |
|                        | Std.          | 1.26 | 1.29 | 1.02 | 1.37 | 0.96 | 1.27 | 1.02 | 1.44 | 0.95 | 1.31 |
|                        | Devia<br>tion |      |      |      |      |      |      |      |      |      |      |
| FS<br>(N=3<br>7)       | Mean          | 2.64 | 2.00 | 3.00 | 2.56 | 2.53 | 2.06 | 2.81 | 2.44 | 2.92 | 2.67 |
|                        | Std.          | 1.38 | 1.41 | 1.07 | 1.52 | 1.06 | 1.26 | 1.17 | 1.38 | 1.08 | 1.22 |
|                        | Devia<br>tion |      |      |      |      |      |      |      |      |      |      |
| JU3<br>(N=3<br>2)      | Mean          | 2.90 | 1.90 | 2.97 | 2.58 | 2.71 | 2.16 | 2.94 | 2.55 | 3.10 | 2.42 |
|                        | Std.          | 1.14 | 1.40 | 0.91 | 1.41 | 1.01 | 1.21 | 1.06 | 1.29 | 0.91 | 1.52 |
|                        | Devia<br>tion |      |      |      |      |      |      |      |      |      |      |
| MB<br>(N=1<br>22)      | Mean          | 2.65 | 1.87 | 2.94 | 2.80 | 2.43 | 2.27 | 2.93 | 2.82 | 2.50 | 2.84 |
|                        | Std.          | 1.02 | 1.30 | 1.04 | 1.33 | 1.01 | 1.13 | 1.04 | 1.11 | 1.13 | 1.19 |
|                        | Devia<br>tion |      |      |      |      |      |      |      |      |      |      |
| HHB<br>2<br>(N=4<br>7) | Mean          | 2.70 | 1.72 | 2.96 | 2.85 | 2.78 | 2.46 | 2.83 | 2.76 | 3.13 | 2.80 |
|                        | Std.          | 1.07 | 1.19 | 1.07 | 1.28 | 0.94 | 1.21 | 0.97 | 1.21 | 0.88 | 1.13 |
|                        | Devia<br>tion |      |      |      |      |      |      |      |      |      |      |
| MS                     | Mean          | 2.87 | 2.33 | 3.10 | 2.87 | 2.40 | 2.27 | 2.83 | 2.60 | 2.77 | 2.50 |

|                      |                               |              |              |              |              |              |              |              |              |              |              |
|----------------------|-------------------------------|--------------|--------------|--------------|--------------|--------------|--------------|--------------|--------------|--------------|--------------|
| (N=3<br>1)           | Std.<br>Devia<br>tion         | 1.01         | 1.45         | 1.09         | 1.36         | 1.13         | 1.28         | 1.21         | 1.25         | 1.14         | 1.36         |
| Total<br>(N=3<br>88) | Mean<br>Std.<br>Devia<br>tion | 2.74<br>1.09 | 1.84<br>1.29 | 2.97<br>1.00 | 2.61<br>1.35 | 2.57<br>1.00 | 2.20<br>1.19 | 2.87<br>1.02 | 2.54<br>1.25 | 2.80<br>1.05 | 2.58<br>1.27 |
