# Supplementary material for: Usability Study of Mainstream Wearable Fitness Devices: Feature Analysis and System Usability Scale Evaluation
Source: PubMed Central journal article supplement (PMC6250954; doi:10.2196/11066), 2018-11-08
Supplement: mhealth_v6i11e11066_app4.pdf [file mhealth_v6i11e11066_app4.pdf]

# Appendix A

## A-4 SUS scores for all questions

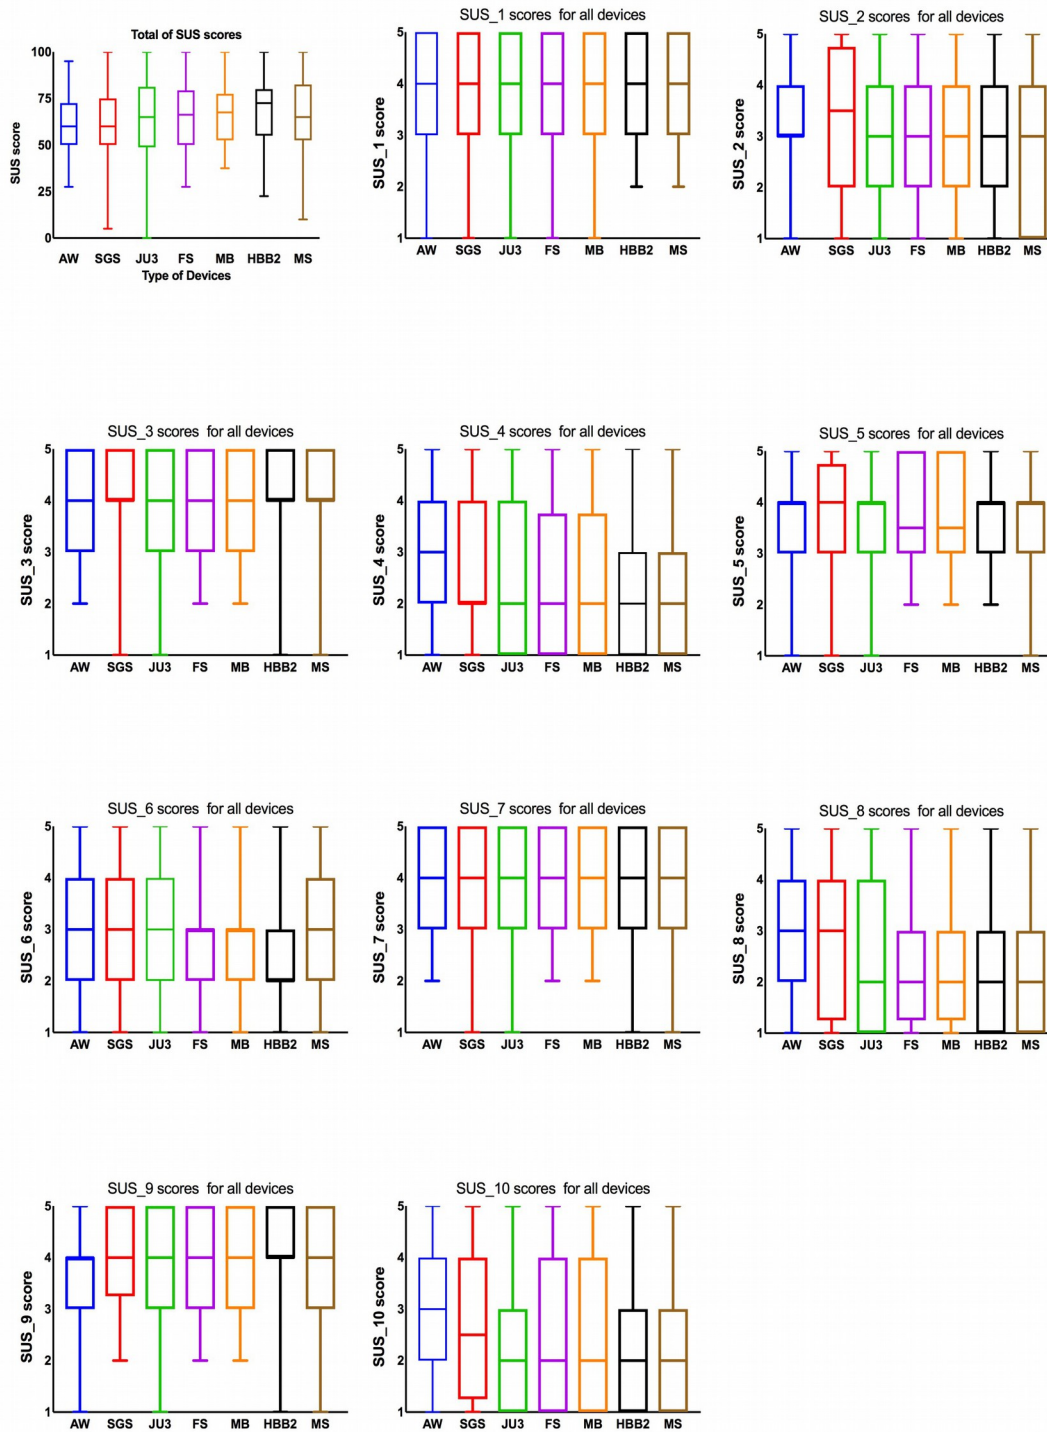

Note:

AW: Apple Watch; SGS: Samsung Gear S; FS: Fitbit Surge; JU3: Jawbone Up3; MB:

Mi Band; HHB2: Huawei Honor B2; MS: Misfit Shine
