# Supplementary material for: Usability Study of Mainstream Wearable Fitness Devices: Feature Analysis and System Usability Scale Evaluation
Source: PubMed Central journal article supplement (PMC6250954; doi:10.2196/11066), 2018-11-08
Supplement: mhealth_v6i11e11066_app5.pdf [file mhealth_v6i11e11066_app5.pdf]

## Appendix A

### A-5 ANOVA tests of the SUS scores and the volunteer's demographic information

Table 7. ANOVA analysis of SUS scores among volunteer's demographic information (length of time the device was used, gender, age, education, profession and monthly income)

|                | Profession     |     |             |      |      |
|----------------|----------------|-----|-------------|------|------|
|                | Sum of Squares | df  | Mean Square | F    | Sig. |
| Between Groups | 5618.23        | 11  | 510.75      | 1.84 | .04  |
| Within Groups  | 104111.19      | 376 | 276.89      |      |      |
| Total          | 109729.43      | 387 |             |      |      |

|                | Length of Time the Device was Used |     |             |      |       |
|----------------|------------------------------------|-----|-------------|------|-------|
|                | Sum of Squares                     | df  | Mean Square | F    | Sig.  |
| Between Groups | 12581.19                           | 6   | 2096.86     | 8.22 | <.001 |
| Within Groups  | 97148.24                           | 381 | 254.98      |      |       |
| Total          | 109729.43                          | 387 |             |      |       |

|                | Gender         |     |             |      |      |
|----------------|----------------|-----|-------------|------|------|
|                | Sum of Squares | df  | Mean Square | F    | Sig. |
| Between Groups | 718.84         | 1   | 718.849     | 2.55 | .11  |
| Within Groups  | 109010.59      | 386 | 282.419     |      |      |

|       |            |     |  |  |  |
|-------|------------|-----|--|--|--|
| Total | 109729.439 | 387 |  |  |  |
|-------|------------|-----|--|--|--|

| Age            |                |     |             |     |      |
|----------------|----------------|-----|-------------|-----|------|
|                | Sum of Squares | df  | Mean Square | F   | Sig. |
| Between Groups | 1368.15        | 6   | 228.03      | .80 | .57  |
| Within Groups  | 108361.28      | 381 | 284.41      |     |      |
| Total          | 109729.43      | 387 |             |     |      |

| Education      |                |     |             |      |      |
|----------------|----------------|-----|-------------|------|------|
|                | Sum of Squares | df  | Mean Square | F    | Sig. |
| Between Groups | 2671.30        | 5   | 534.26      | 1.91 | .092 |
| Within Groups  | 107058.13      | 382 | 280.26      |      |      |
| Total          | 109729.43      | 387 |             |      |      |

| Monthly Income |                |     |             |      |      |
|----------------|----------------|-----|-------------|------|------|
|                | Sum of Squares | df  | Mean Square | F    | Sig. |
| Between Groups | 2629.02        | 4   | 657.26      | 2.35 | .06  |
| Within Groups  | 107100.41      | 383 | 279.64      |      |      |
| Total          | 109729.43      | 387 |             |      |      |
